# Supplementary material for: POM-based inorganic–organic hybrid compounds: synthesis, structures, highly-connected topologies and photodegradation of organic dyes
Source: Royal Society of Chemistry journal article supplement (doi:10.1039/c5ra09339b), 2015-01-01
Supplement: c5ra09339b1.pdf [file c5ra09339b1.pdf]

## Electronic Supplementary Information (ESI)

### **POM-based inorganic-organic hybrid compounds: synthesis, structures, high-connected topologies and photodegradation of Organic dyes**

*Xiao Li, Liu Yang, Chao Qin,\* Fu-Hong Liu, Liang Zhao,\* Kui-Zhan Shao and Zhong-Min Su\**

*Institute of Functional Material Chemistry, Key Lab of Polyoxometalate Science of Ministry of Education, Faculty of Chemistry, Northeast Normal University, Changchun, 130024 Jilin, People's Republic of China.*

\*E-mail: [zmsu@nenu.edu.cn](mailto:zmsu@nenu.edu.cn)

## Table of Contents

|                                                                                                                                                                                                                                    |     |
|------------------------------------------------------------------------------------------------------------------------------------------------------------------------------------------------------------------------------------|-----|
| <b>Table S1</b> Selected Bonds Lengths (Å) and Angles (°) for compounds <b>1-4</b> . .....                                                                                                                                         | S3  |
| <b>Fig. S1</b> Experimental (red), simulated (black) and the experimental after photocatalytic reaction (blue) PXRD patterns for compound <b>1</b> (a); compound <b>2</b> (b); compound <b>3</b> (c); compound <b>4</b> (d). ..... | S7  |
| <b>Fig. S2</b> The TGA curves for compounds <b>1-4</b> . .....                                                                                                                                                                     | S8  |
| <b>Fig. S3</b> The IR spectra of compounds <b>1-4</b> (black) and compound <b>2</b> after photocatalytic reaction (blue). .....                                                                                                    | S9  |
| <b>Fig. S4</b> The UV spectra of compounds <b>1-4</b> . .....                                                                                                                                                                      | S9  |
| <b>Fig. S5</b> The recycle times on the MB degradation with compound <b>2</b> as catalyst.....                                                                                                                                     | S10 |

**Table S1. Selected Bonds Lengths (Å) and Angles (°) for compounds 1-4**

| Compound 1         |            |                    |            |
|--------------------|------------|--------------------|------------|
| Mn(1)-O(1A)        | 1.995(2)   | O(1A) -Mn(1)-N(2)  | 90.36(11)  |
| Mn(1)-O(1)         | 1.995(2)   | O(1)-Mn(1)-N(2)    | 89.64(11)  |
| Mn(1)-N(2A)        | 2.189(3)   | N(2A) -Mn(1)-N(2)  | 180.0      |
| Mn(1)-N(2)         | 2.189(3)   | O(1A) -Mn(1)-N(1A) | 90.31(11)  |
| Mn(1)-N(1A)        | 2.224(3)   | O(1)-Mn(1)-N(1A)   | 89.69(11)  |
| Mn(1)-N(1)         | 2.224(3)   | N(2A) -Mn(1)-N(1A) | 89.47(12)  |
| V(1)-O(2)          | 1.615(3)   | N(2)-Mn(1)-N(1A)   | 90.53(12)  |
| V(1)-O(1)          | 1.651(2)   | O(1A) -Mn(1)-N(1)  | 89.69(11)  |
| V(1)-O(3)          | 1.771(3)   | O(1)-Mn(1)-N(1)    | 90.31(11)  |
| O(1A) -Mn(1)-O(1)  | 180.00(14) | N(2A) -Mn(1)-N(1)  | 90.53(12)  |
| O(1A) -Mn(1)-N(2A) | 89.64(11)  | N(2)-Mn(1)-N(1)    | 89.47(12)  |
| O(1)-Mn(1)-N(2A)   | 90.36(11)  | N(1A) -Mn(1)-N(1)  | 180.0      |
| O(2)-V(1)-O(1)     | 108.99(16) | V(1)-O(1)-Mn(1)    | 177.64(18) |
| O(2)-V(1)-O(3)     | 110.49(19) | V(1)-O(3)-V(1C)    | 155.1(2)   |
| Compound 2         |            |                    |            |
| Ag(1)-N(4)         | 2.212(8)   | O(1)-V(1)-O(2)     | 109.3(4)   |
| Ag(1)-N(3)         | 2.222(8)   | O(1)-V(1)-O(3)     | 111.2(4)   |
| Ag(2)-N(2)         | 2.121(8)   | O(2)-V(1)-O(3)     | 111.3(4)   |
| Ag(2)-N(1)         | 2.145(9)   | O(1)-V(1)-O(4)     | 109.5(4)   |
| Ag(2)-O(6)         | 2.374(8)   | O(2)-V(1)-O(4)     | 105.7(4)   |
| V(1)-O(1)          | 1.607(7)   | O(3)-V(1)-O(4)     | 109.8(3)   |
| V(1)-O(2)          | 1.608(7)   | O(5)-V(2)-O(6)     | 109.6(4)   |
| V(1)-O(3)          | 1.785(7)   | O(5)-V(2)-O(3)#3   | 109.5(4)   |
| V(1)-O(4)          | 1.807(8)   | O(6)-V(2)-O(3)#3   | 109.3(4)   |
| O(6)-V(2)-O(4)     | 106.6(4)   | O(5)-V(2)-O(4)     | 110.7(4)   |
| V(2)-O(5)          | 1.594(8)   | O(3)#3-V(2)-O(4)   | 111.0(3)   |
| V(2)-O(6)          | 1.606(8)   | V(2)#3-O(3)-V(1)   | 155.9(5)   |
| V(2)-O(3)#3        | 1.775(7)   | V(1)-O(4)-V(2)     | 132.1(5)   |

|                   |            |                    |            |
|-------------------|------------|--------------------|------------|
| V(2)-O(4)         | 1.814(7)   | V(2)-O(6)-Ag(2)    | 153.8(5)   |
| O(3)-V(2)#3       | 1.775(7)   | N(2)-Ag(2)-O(6)    | 104.7(3)   |
| N(4)-Ag(1)-N(3)   | 160.7(3)   | N(1)-Ag(2)-O(6)    | 95.8(3)    |
| N(2)-Ag(2)-N(1)   | 158.1(3)   |                    |            |
| Compound 3        |            |                    |            |
| Ni(1)-O(4)        | 2.042(2)   | Ni(1)-O(1W)        | 2.113(3)   |
| Ni(1)-N(4)        | 2.077(2)   | Ni(2)-N(2B)        | 2.102(2)   |
| Ni(1)-N(3)        | 2.083(2)   | Ni(2)-N(2)         | 2.102(2)   |
| Ni(1)-O(8)        | 2.085(2)   | Ni(2)-O(1B)        | 2.111(2)   |
| Ni(1)-O(2W)       | 2.102(2)   | Ni(2)-O(1)         | 2.111(2)   |
| Ni(2)-N(1B)       | 2.158(2)   | O(4)-Ni(1)-N(4)    | 93.71(9)   |
| Ni(2)-N(1)        | 2.158(2)   | O(4)-Ni(1)-N(3)    | 94.42(9)   |
| V(1)-O(7)         | 1.620(2)   | N(4)-Ni(1)-N(3)    | 88.12(9)   |
| V(1)-O(8)         | 1.659(2)   | O(4)-Ni(1)-O(8)    | 170.66(8)  |
| V(1)-O(9)         | 1.771(2)   | N(4)-Ni(1)-O(8)    | 93.97(9)   |
| V(1)-O(6)         | 1.809(2)   | N(3)-Ni(1)-O(8)    | 91.14(9)   |
| V(2)-O(5)         | 1.614(2)   | O(4)-Ni(1)-O(2W)   | 87.70(9)   |
| V(2)-O(4D)        | 1.650(2)   | N(4)-Ni(1)-O(2W)   | 86.17(9)   |
| V(2)-O(9E)        | 1.792(2)   | N(3)-Ni(1)-O(2W)   | 174.03(9)  |
| V(2)-O(2)         | 1.8059(19) | O(8)-Ni(1)-O(2W)   | 87.52(9)   |
| V(3)-O(3)         | 1.650(2)   | O(4)-Ni(1)-O(1W)   | 84.98(10)  |
| V(3)-O(1)         | 1.651(2)   | N(4)-Ni(1)-O(1W)   | 175.00(10) |
| V(3)-O(2)         | 1.7786(19) | N(3)-Ni(1)-O(1W)   | 96.79(10)  |
| V(3)-O(6)         | 1.779(2)   | O(8)-Ni(1)-O(1W)   | 86.92(10)  |
| O(4)-V(2D)        | 1.650(2)   | O(2W)-Ni(1)-O(1W)  | 88.96(10)  |
| O(9)-V(2)#4       | 1.792(2)   | N(2B) -Ni(2)-N(2)  | 180.0      |
| O(1B) -Ni(2)-N(1) | 90.05(8)   | N(2B) -Ni(2)-O(1B) | 90.46(8)   |
| O(1)-Ni(2)-N(1)   | 89.95(8)   | N(2)-Ni(2)-O(1B)   | 89.54(8)   |
| N(1B) -Ni(2)-N(1) | 180.0      | O(4)-Ni(1)-O(1W)   | 84.98(10)  |
| O(7)-V(1)-O(8)    | 106.97(11) | N(4)-Ni(1)-O(1W)   | 175.00(10) |
| O(7)-V(1)-O(9)    | 108.21(13) | N(2B) -Ni(2)-O(1)  | 89.54(8)   |

|                   |            |                    |            |
|-------------------|------------|--------------------|------------|
| O(8)-V(1)-O(9)    | 112.68(12) | N(2)-Ni(2)-O(1)    | 90.46(8)   |
| O(7)-V(1)-O(6)    | 110.40(12) | O(1B) -Ni(2)-O(1)  | 180.0      |
| O(8)-V(1)-O(6)    | 109.76(10) | N(2B) -Ni(2)-N(1B) | 86.55(8)   |
| O(9)-V(1)-O(6)    | 108.80(11) | N(2)-Ni(2)-N(1B)   | 93.45(8)   |
| O(5)-V(2)-O(4D)   | 109.05(13) | O(1B) -Ni(2)-N(1B) | 89.95(8)   |
| O(5)-V(2)-O(9E)   | 108.97(14) | O(1)-Ni(2)-N(1B)   | 90.05(8)   |
| O(4D) -V(2)-O(9E) | 109.84(11) | N(2B)-Ni(2)-N(1)   | 93.45(8)   |
| O(5)-V(2)-O(2)    | 109.10(12) | N(2)-Ni(2)-N(1)    | 86.55(8)   |
| O(4D) -V(2)-O(2)  | 109.44(10) | N(2B) -Ni(2)-O(1)  | 89.54(8)   |
| O(9E) -V(2)-O(2)  | 110.41(11) | V(3)-O(2)-V(2)     | 140.90(12) |
| O(3)-V(3)-O(1)    | 110.09(10) | V(2D) -O(4)-Ni(1)  | 167.78(13) |
| O(3)-V(3)-O(2)    | 109.42(10) | V(3)-O(6)-V(1)     | 133.26(12) |
| O(1)-V(3)-O(2)    | 109.41(10) | V(1)-O(9)-V(2)#4   | 153.98(18) |
| O(3)-V(3)-O(6)    | 107.82(10) | V(1)-O(8)-Ni(1)    | 142.01(12) |
| O(1)-V(3)-O(6)    | 108.56(10) | V(3)-O(1)-Ni(2)    | 168.40(12) |
| O(2)-V(3)-O(6)    | 111.53(10) |                    |            |
| Compound 4        |            |                    |            |
| V(1)-O(8)         | 1.624(4)   | V(2)-O(5)          | 1.663(3)   |
| V(1)-O(1)         | 1.656(3)   | V(2)-O(6)          | 1.780(3)   |
| V(1)-O(3)         | 1.777(3)   | V(2)-O(10)#1       | 1.785(3)   |
| V(1)-O(10)        | 1.809(3)   | Zn(1)-O(5)#2       | 2.126(3)   |
| V(2)-O(4)         | 1.647(3)   | Zn(1)-O(5)         | 2.126(3)   |
| Zn(1)-N(2)#2      | 2.148(3)   | O(8)-V(1)-O(1)     | 107.06(18) |
| Zn(1)-N(2)        | 2.148(3)   | O(8)-V(1)-O(3)     | 108.6(2)   |
| Zn(1)-N(3)        | 2.207(3)   | O(1)-V(1)-O(3)     | 112.28(18) |
| Zn(1)-N(3)#2      | 2.207(3)   | O(8)-V(1)-O(10)    | 109.96(19) |
| Zn(2)-O(2)        | 2.068(3)   | O(1)-V(1)-O(10)    | 109.96(16) |
| Zn(2)-N(4)        | 2.130(4)   | O(3)-V(1)-O(10)    | 108.91(16) |
| Zn(2)-N(1)        | 2.131(4)   | O(4)-V(2)-O(5)     | 109.71(16) |
| Zn(2)-O(1)        | 2.137(3)   | O(4)-V(2)-O(6)     | 109.63(15) |
| Zn(2)-O(1W)       | 2.141(3)   | O(5)-V(2)-O(6)     | 109.20(15) |

|                     |            |                     |            |
|---------------------|------------|---------------------|------------|
| Zn(2)-O(2W)         | 2.169(3)   | O(4)-V(2)-O(10)#1   | 107.95(15) |
| V(3)-O(7)           | 1.611(4)   | O(5)-V(2)-O(10)#1   | 108.64(15) |
| V(3)-O(2)           | 1.648(3)   | O(6)-V(2)-O(10)#1   | 111.68(16) |
| V(3)-O(3)#3         | 1.789(4)   | O(5)#2-Zn(1)-O(5)   | 180.00(13) |
| V(3)-O(6)           | 1.809(3)   | O(5)#2-Zn(1)-N(2)#2 | 90.59(12)  |
| O(3)-V(3)#8         | 1.789(4)   | O(5)-Zn(1)-N(2)#2   | 89.41(12)  |
| O(10)-V(2)#1        | 1.785(3)   | O(5)#2-Zn(1)-N(2)   | 89.41(12)  |
| N(2)#2-Zn(1)-N(3)   | 94.06(13)  | O(5)-Zn(1)-N(2)     | 90.59(12)  |
| N(2)-Zn(1)-N(3)     | 85.94(13)  | N(2)#2-Zn(1)-N(2)   | 180.0(2)   |
| O(5)#2-Zn(1)-N(3)#2 | 89.43(12)  | O(5)#2-Zn(1)-N(3)   | 90.57(12)  |
| O(5)-Zn(1)-N(3)#2   | 90.57(12)  | O(5)-Zn(1)-N(3)     | 89.43(12)  |
| N(2)#2-Zn(1)-N(3)#2 | 85.94(13)  | N(2)#2-Zn(1)-N(3)   | 94.06(13)  |
| N(2)-Zn(1)-N(3)#2   | 94.06(13)  | N(2)-Zn(1)-N(3)     | 85.94(13)  |
| N(3)-Zn(1)-N(3)#2   | 180.00(19) | O(5)#2-Zn(1)-N(3)#2 | 89.43(12)  |
| O(2)-Zn(2)-N(4)     | 95.04(14)  | O(5)-Zn(1)-N(3)#2   | 90.57(12)  |
| O(2)-Zn(2)-N(1)     | 93.69(14)  | N(2)#2-Zn(1)-N(3)#2 | 85.94(13)  |
| N(4)-Zn(2)-N(1)     | 87.77(14)  | N(2)-Zn(1)-N(3)#2   | 94.06(13)  |
| O(7)-V(3)-O(2)      | 109.1(2)   | N(3)-Zn(1)-N(3)#2   | 180.00(19) |
| O(7)-V(3)-O(3)#3    | 108.8(2)   | O(2)-Zn(2)-N(4)     | 95.04(14)  |
| O(2)-V(3)-O(3)#3    | 109.71(17) | O(2)-Zn(2)-N(1)     | 93.69(14)  |
| O(7)-V(3)-O(6)      | 108.78(19) | N(4)-Zn(2)-N(1)     | 87.77(14)  |
| O(2)-V(3)-O(6)      | 109.45(15) | O(1)-Zn(2)-O(2W)    | 87.22(12)  |
| O(3)#3-V(3)-O(6)    | 111.00(16) | O(1W)-Zn(2)-O(2W)   | 87.19(13)  |

Symmetry codes: for compound **1**: (A)  $-x + 1, -y + 2, -z$ ; (C)  $x + 1/4, -y + 5/4, -z + 1/4$ ; for compound **2**: #3  $-x - 1, -y + 1, -z + 1$ ; for compound **3**: (B)  $-x, -y + 1, -z + 1$ ; (D)  $-x + 1, -y + 1, -z + 1$ ; (E)  $-x + 1/2, y + 1/2, -z + 1/2$ ; #4  $-x + 1/2, y - 1/2, -z + 1/2$ ; for compound **4**: #1  $-x - 1, -y, -z$ ; #2  $-x, -y, -z$ ; #3  $x + 1/2, -y - 1/2, z + 1/2$ ; #8  $x - 1/2, -y - 1/2, z - 1/2$ .

(a)

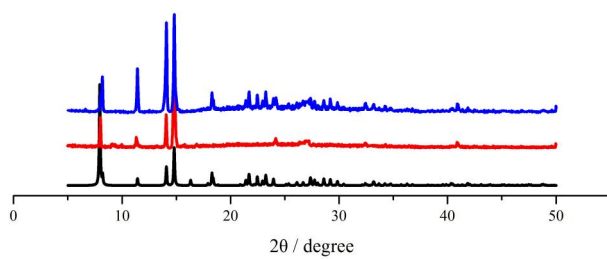

(b)

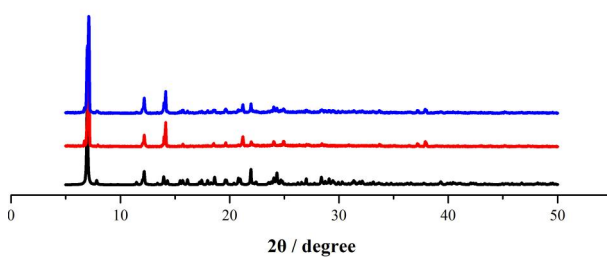

(c)

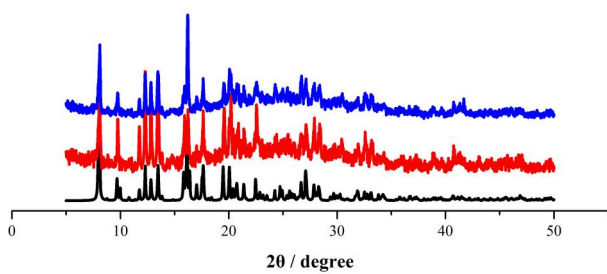

(d)

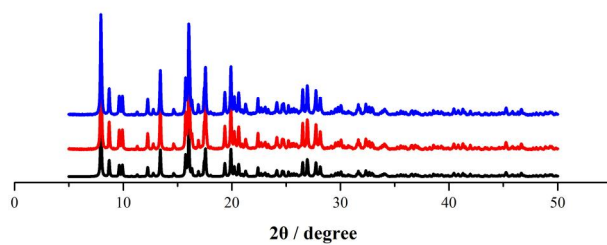

**Fig. S1** Experimental (red), simulated (black) and the experimental after photocatalytic reaction (blue) PXRD patterns for compound **1**(a); compound **2** (b); compound **3** (c); compound **4** (d).

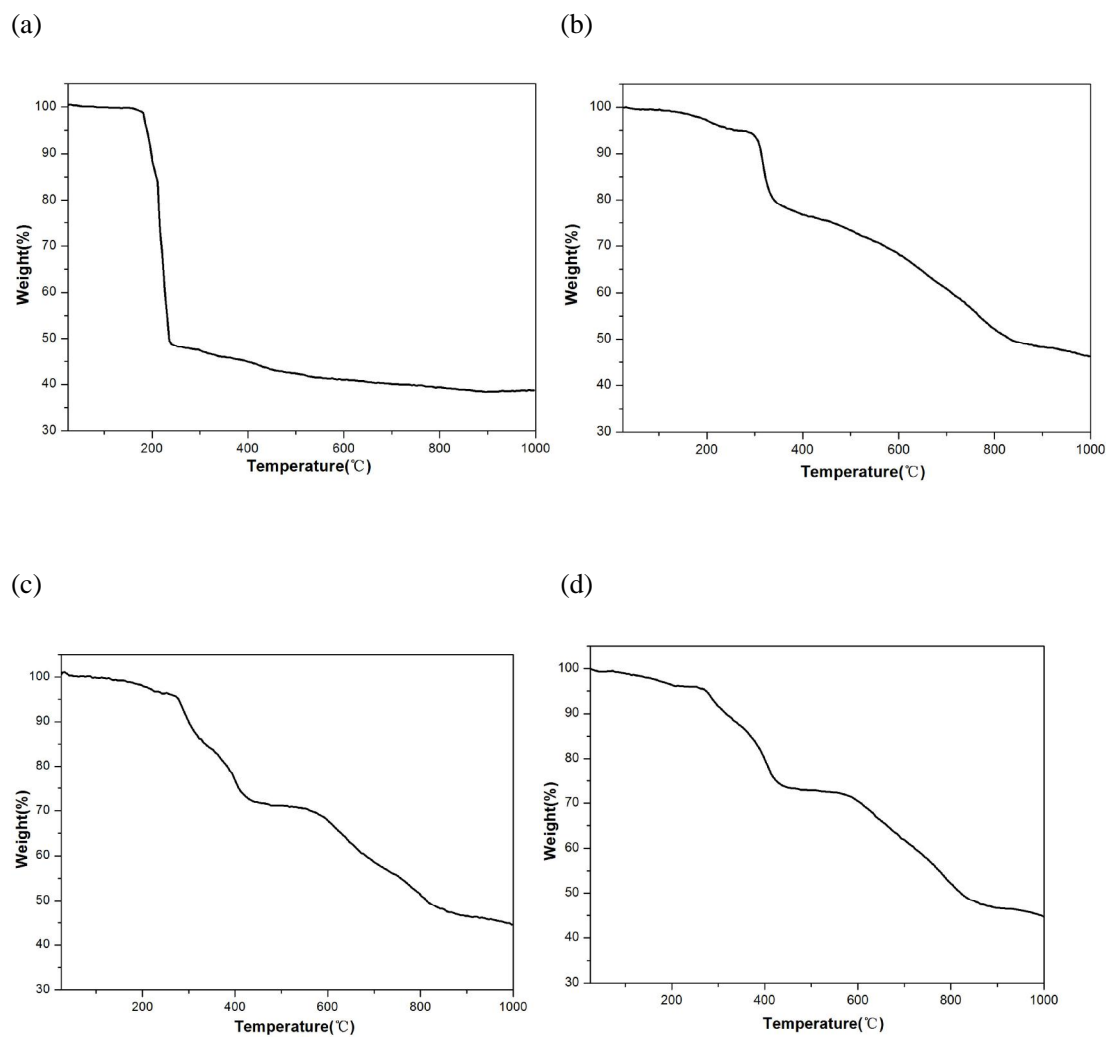

**Fig. S2** The TGA curves for compound **1**(a); compound **2** (b); compound **3** (c); compound **4** (d).



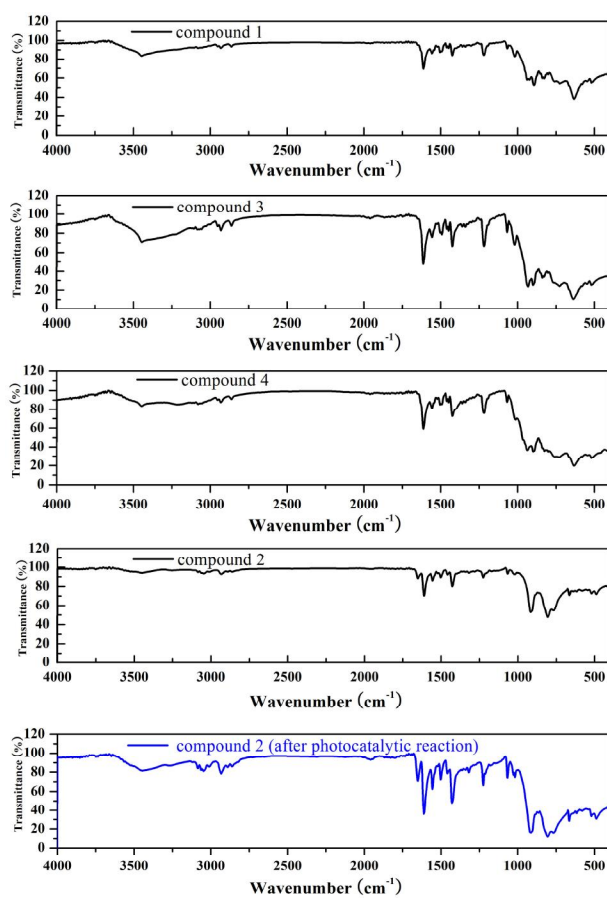

**Fig. S3** The IR spectra of compounds 1–4 (black ) and compound 2 after photocatalytic reaction (blue).

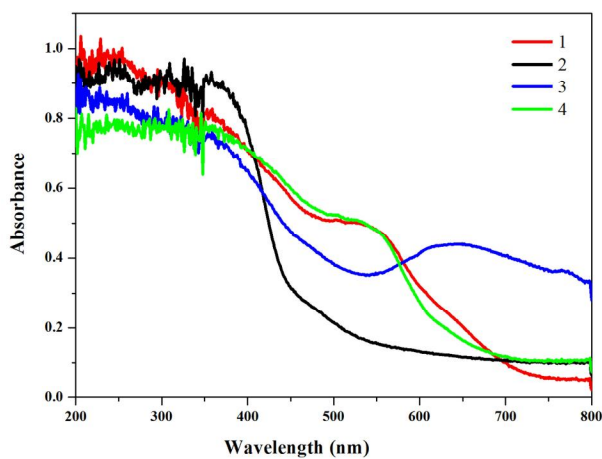

**Fig. S4** The UV spectra of compounds 1-4.

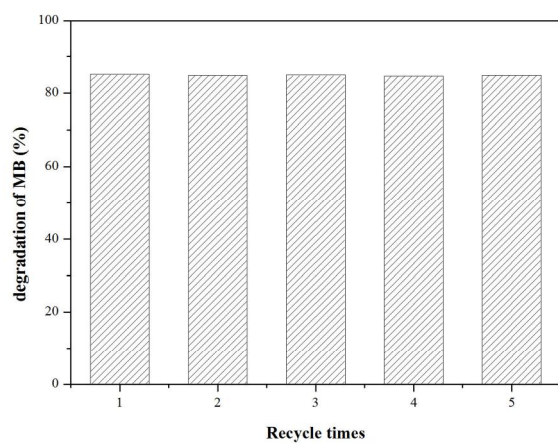

**Fig. S5** The recycle times on the MB degradation with compound **2** as catalyst.
